# Supplementary material for: Utility of low-cost sensor measurement for predicting ambient PM2.5 concentrations: evidence from a monitoring network in Accra, Ghana
Source: Royal Society of Chemistry journal article supplement (doi:10.1039/d4ea00140k), 2025-01-01
Supplement: d4ea00140k1.pdf [file d4ea00140k1.pdf]

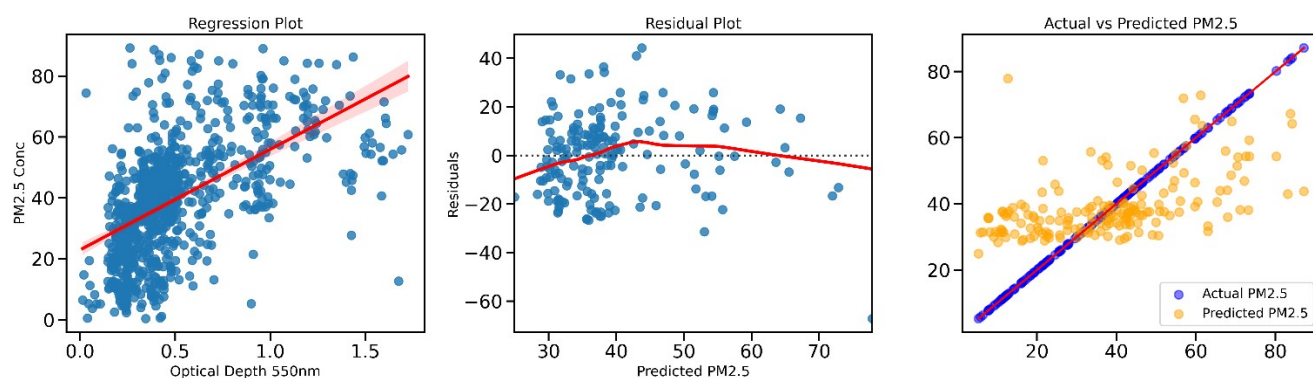

**Figure S1.** Scatter plot of uncorrected Clarity PM2.5 concentrations and AOD 550nm for dry season

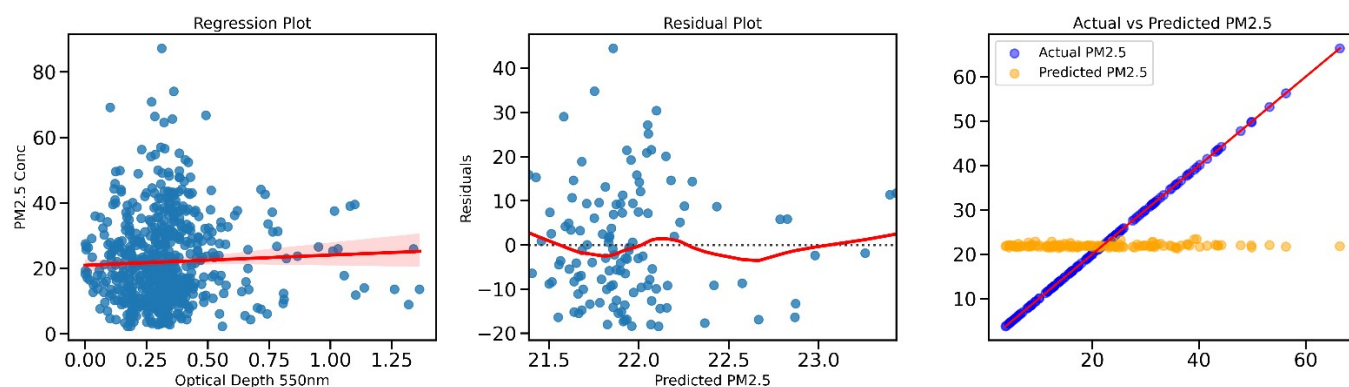

**Figure S2.** Scatter plot of uncorrected Clarity PM2.5 concentrations and AOD 550nm for wet season

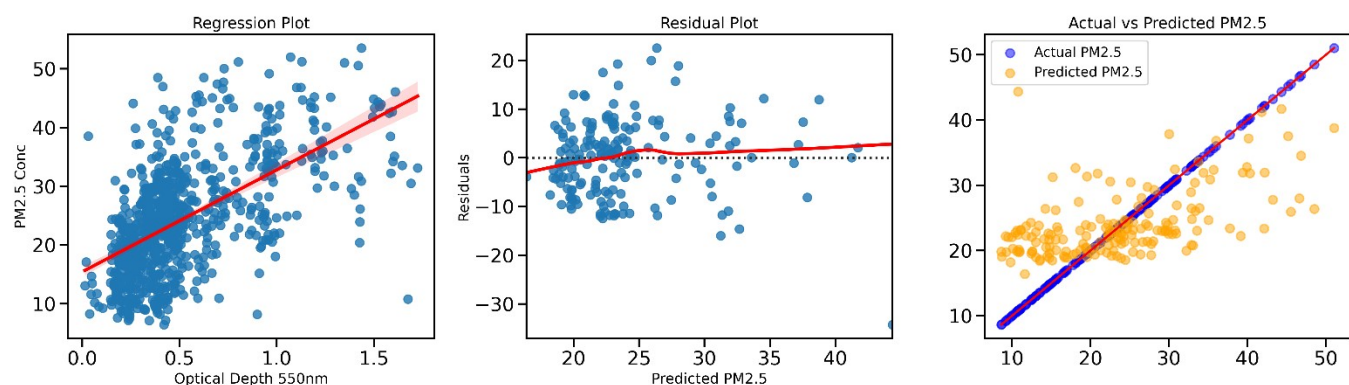

**Figure S3.** Scatter plot of corrected Clarity PM2.5 concentrations and AOD 550nm for dry season

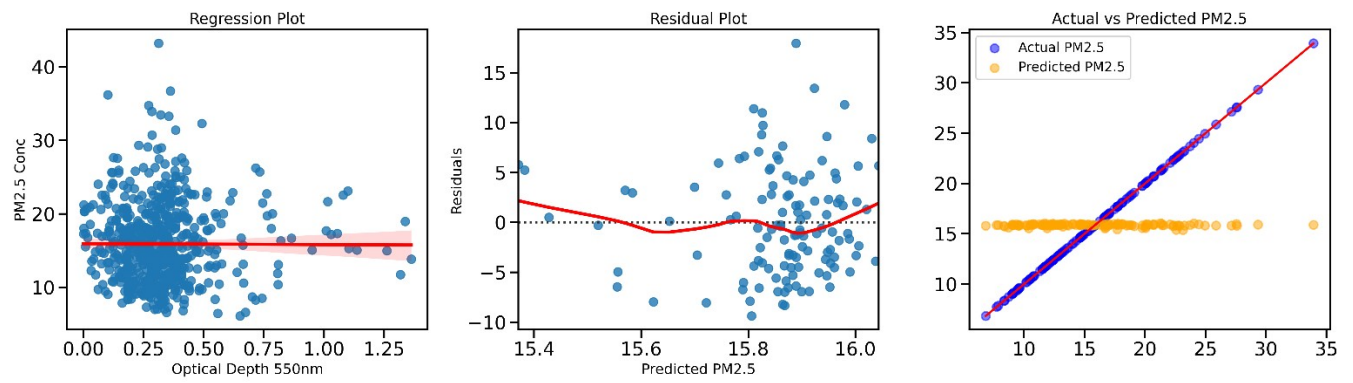

**Figure S4.** Scatter plot of corrected Clarity PM2.5 concentrations and AOD 550nm for wet season

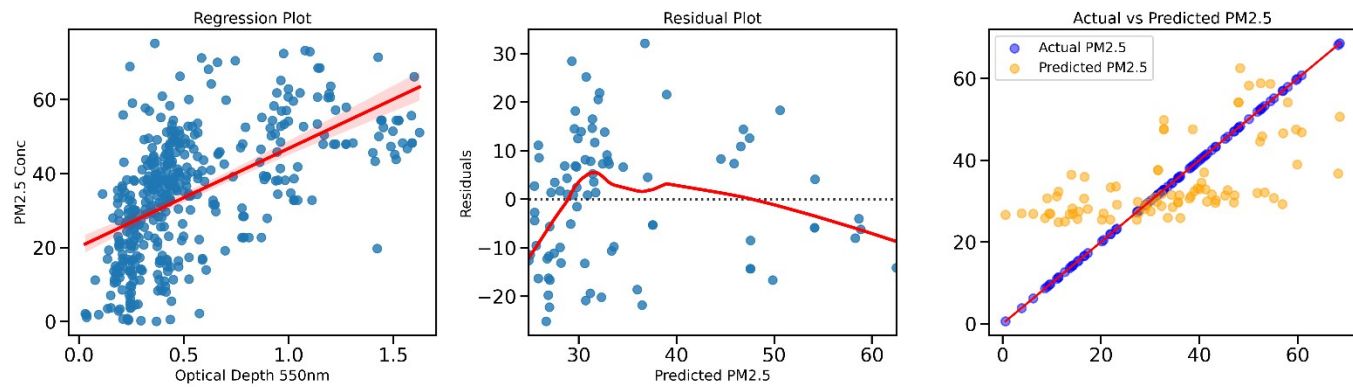

**Figure S5.** Scatter plot for Airnote PM2.5 concentrations and AOD 550nm for dry season

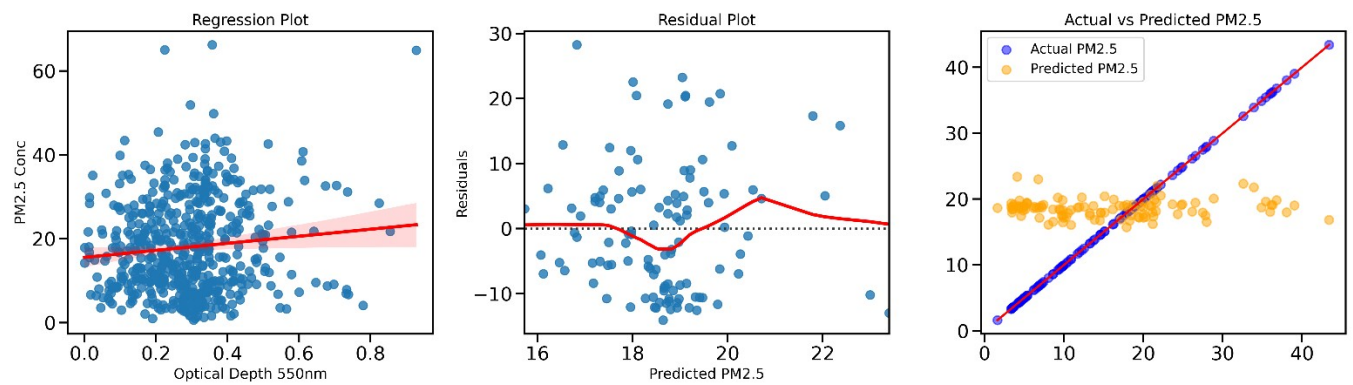

**Figure S6.** Scatter plot for Airnote PM2.5 concentrations and AOD 550nm for wet season
